# Supplementary material
Source: Springer Nature journal article supplement (https://www.springermedizin.de/resource/supplementary/12889_2014_7337_MOESM1_ESM.pdf/9497318)

# Addis Ababa city Administration

## Health Bureau

10 sub cities

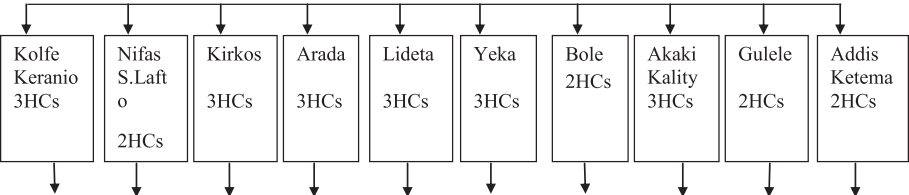

Simple Random Sampling (Lottery approach)

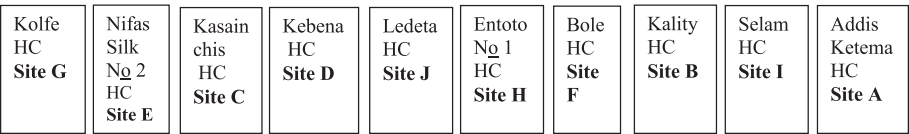

Supplement: MOESM1 [file 9497318]
